Deletion of murine IQGAP1 results in increased mTOR activation and blunted ketogenic response

**Classification:** Major - Biological Sciences, Minor - Physiology

**Title: Deletion of murine IQGAP1 results in increased mTOR activation and blunted ketogenic response.**

Hanna Erickson<sup>a</sup> and \*Sayeepriyadarshini Anakk<sup>a</sup>

<sup>a</sup>Department of Molecular and Integrative Physiology, University of Illinois at Urbana-Champaign, Urbana, IL 61801.

\*Corresponding Author

Deletion of murine IQGAP1 results in increased mTOR activation and blunted ketogenic response

## Abstract

IQ motif-containing GTPase Activating Protein 1 (IQGAP1) is a ubiquitously expressed scaffolding protein that integrates signaling from multiple cellular processes including motility, adhesion, and proliferation. Here, we show that IQGAP1 is induced in the liver upon fasting and can also regulate  $\beta$ -oxidation and ketone body synthesis. Utilizing ketogenic diet and pharmacologic activation we identified that hepatic PPAR $\alpha$  activity is compromised in *lqgap1*<sup>-/-</sup> mice. Our data show that IQGAP1 interacts with the mechanistic target of rapamycin (mTOR) and IQGAP1 deletion results in enhanced mTOR complex 1 (mTORC1) activation. Conversely, ectopic expression of IQGAP1 in *lqgap1*<sup>-/-</sup> mice was sufficient to suppress mTORC1 signaling. We also confirmed that modulation of mTORC1 signaling by IQGAP1 is cell autonomous. This increased mTORC1 activation impedes PPAR $\alpha$  signaling since mTORC1 inhibition restored a subset of metabolic genes in *lqgap1*<sup>-/-</sup> mice. Overall, we demonstrate a previously unidentified role for IQGAP1 as an important regulator of mTORC1 activity and long-term ketosis.

Deletion of murine IQGAP1 results in increased mTOR activation and blunted ketogenic response

## Introduction

The IQ motif-containing GTPase Activating Protein (IQGAP) family of multi-domain scaffolding proteins includes three members, of which IQGAP1 is the only ubiquitously expressed isoform (1-5). IQGAP1 interacts with several binding partners and integrates signals that control diverse cellular processes such as cell-cell adhesion via E-Cadherin (6), cell motility via Cdc42 and Rac1 (7), cell proliferation via the Ras/MAP kinase pathway (8), and membrane receptor signaling via EGF receptor (9). More recently, its role in scaffolding PI-3K/ AKT signaling and subsequent glucose homeostasis has been identified (10, 11). Because IQGAP1 regulates several energy-requiring cellular processes, we hypothesized that IQGAP1 may also coordinate the response to changes in metabolic state.

The liver is a central organ responsible for nutrient metabolism. In the fed state, the liver responds to high insulin levels by promoting *de novo* lipogenesis to store excess calories in adipose depots (12). On the other hand, in the fasted state, the liver breaks down fatty acids to synthesize ketone bodies, which are an effective alternate fuel source. Ketogenesis is crucial to maintain energy levels during fasting. It can also be induced nutritionally with a low-carbohydrate, low protein, high-fat diet known as the ketogenic diet (KD). This process is largely regulated transcriptionally by the nuclear receptor PPAR $\alpha$  (13-18).

It has been shown that the major fed state sensor mechanistic target of rapamycin (mTOR) complex 1 (mTORC1) (19, 20) can cross-talk with PPAR $\alpha$  signaling and restrict its activity to the fasting state (21). mTORC1 includes three-core components: mTOR, Regulatory-associated Protein of mTOR (RAPTOR) and mammalian lethal with Sec13 protein 8 (LS8). This complex regulates protein translation through p70-S6 Kinase 1 (S6K1) and eukaryotic translation initiation factor 4E binding protein 1 (4E-BP1) (22, 23), lipid synthesis through sterol responsive element binding protein (SREBP) (24), and glycolysis through phospho-fructo kinase (25). In addition, mTORC1 suppresses fasting-associated ketogenesis (21) and autophagy (26-28). Inversely, during fasting state, mTORC1 activity is suppressed by AMPK (29). Thus,

Deletion of murine IQGAP1 results in increased mTOR activation and blunted ketogenic response

mTORC1 activity cycles up and down between fed and fasted states to couple anabolic and catabolic processes with nutrient availability.

Here we show that compared to the fed state, hepatic IQGAP1 levels are induced upon fasting, and its deletion impairs the ketogenic response. Since PPAR $\alpha$  regulates ketogenesis, we examined its pharmacological activation in the presence and absence of IQGAP1.

Compared to WT, IQGAP1-null (*Iqgap1*<sup>-/-</sup>) mice show blunted response to PPAR $\alpha$  activation.

Mechanistically, *Iqgap1*<sup>-/-</sup> mice exhibit increased hepatic mTORC1 activity, which in turn inhibits the fasting response. Conversely, reintroducing IQGAP1 to the liver of *Iqgap1*<sup>-/-</sup> mice decreases mTORC1 activity and promotes expression of genes involved in ketogenesis. These data together uncover a novel role for IQGAP1 in controlling ketone body synthesis. Importantly, primary liver cells and the well-established human hepatoma HepG2 cell line recapitulate these results, indicating a cell autonomous role for IQGAP1 in regulating mTORC1 activity.

Additionally, inhibition of mTOR activity in *Iqgap1*<sup>-/-</sup> mice with rapamycin reverses some of the misregulated PPAR $\alpha$  responses. Taken together, these results show that IQGAP1 is necessary to elicit appropriate ketogenic response in the liver.

## Results

### Hepatic IQGAP1 deletion alters the fasting response

IQGAP1 integrates multiple signaling pathways, and its expression level largely determines its function as a scaffold (30). Therefore, we examined whether IQGAP1 coordinates the metabolic response to changes in nutrition status by fasting wild-type (WT) mice for 24 hours and analyzing IQGAP1 expression. We found a significant increase in *Iqgap1* transcript levels in the liver (figure 1A) upon fasting that corroborated well with the robust increase in IQGAP1 protein expression (figure 1B). The increase in IQGAP1 expression was specific to the liver and was not observed in white adipose tissue (WAT) (figure S1A).

## Deletion of murine IQGAP1 results in increased mTOR activation and blunted ketogenic response

To characterize the significance of hepatic IQGAP1 induction in fasting, we carefully examined the fasting response in *lqgap1*<sup>-/-</sup> mice. Upon a 24-hour fast, both WT and *lqgap1*<sup>-/-</sup> mice (31) lost comparable amount of body weight (figure S1B) and liver weight (figure S1C). As expected, serum glucose levels decreased with fasting, but this decrease was exaggerated in *lqgap1*<sup>-/-</sup> mice since these mice were hyperglycemic in the fed state (figure S1D) and exhibited a trend towards insulin resistance (figure S1E). This is in line with recently published data that showed loss of IQGAP1 protein results in poor glucose tolerance (10). However, the observed reduction in fasting glucose is not due to lack of gluconeogenic response in the *lqgap1*<sup>-/-</sup> livers (Figure S1F).

Next, we analyzed the effect of IQGAP1 deletion on lipid metabolism. Fasting increased serum non-esterified fatty acids (NEFAs) and modestly reduced serum triglyceride levels in WT animals (figure 1C-D). Even though fasting levels of serum triglyceride and NEFA were significantly lower in *lqgap1*<sup>-/-</sup> mice, the fold-changes in these metabolites were comparable between the two groups. This is because, compared to WT, the average serum NEFA and triglyceride levels were lower in *lqgap1*<sup>-/-</sup> mice even in the fed state. To ensure this was not due to poor fat mobilization, we tested the expression of the three main lipases (*Hsl*, *Lpl*, and *Atgl*) in adipose tissue and found no difference between WT and *lqgap1*<sup>-/-</sup> (Figure S1G). The *lqgap1*<sup>-/-</sup> mice lost on average 8% of their visceral adipose by weight upon fasting while the WT mice lost 5%, indicating that lipolysis defects do not contribute to the observed changes in circulating free fatty acid levels (Figure S1H). Furthermore, histological analysis did not reveal any overt difference between WT and *lqgap1*<sup>-/-</sup> livers, which accumulated triglycerides to a similar extent upon fasting (figure 1C). We then examined the fasting response in the liver by measuring transcript levels of  $\beta$ -oxidation genes Carnitine O-Palmitoyltransferase Ia (*Cpt 1a*), medium chain acyl-CoA dehydrogenase (*Acadm*), the alpha subunit of hydroxyacyl-CoA dehydrogenase (*Hadha*), and *Fgf21*, a known fasting responsive gene. Despite no difference in induction of *Cpt1a* levels (figure 1F) nor serum ketone body ( $\beta$ -hydroxybutyrate) levels [WT fasting:  $1.50 \pm$

Deletion of murine IQGAP1 results in increased mTOR activation and blunted ketogenic response

0.36 mM; *lqgap1*<sup>-/-</sup> fasting: 1.72 ± 0.55 mM], we observed significantly dampened induction of *Acadm*, *Hadha*, and *Fgf21* in *lqgap1*<sup>-/-</sup> mice (figure 1G). Consistently, we found that *lqgap1*<sup>-/-</sup> mice had lower circulating FGF21 levels (figure 1H). These data uncover a role for IQGAP1 in maintaining appropriate hepatic fatty acid metabolism during fasting.

### **IQGAP1 is necessary to orchestrate ketogenic adaptation.**

Since *lqgap1*<sup>-/-</sup> mice exhibit decreased expression of a few genes involved in  $\beta$ -oxidation and the fasting response, despite remaining capable of mobilizing fat, we examined if long-term ketosis was also altered. To test this, WT and *lqgap1*<sup>-/-</sup> mice were fed a high-fat, low-carbohydrate ketogenic diet (KD) for 4 weeks. Both cohorts of mice displayed similar overall body weight throughout the experiment. KD feeding resulted in an expected reduction in liver weight, but this response was dramatically blunted in *lqgap1*<sup>-/-</sup> mice (figure 2A). Histological analysis revealed more microsteatosis in the livers of *lqgap1*<sup>-/-</sup> mice compared to WT (figure 2B). As a result, their livers appeared paler, and their serum NEFA and triglycerides were significantly lower than WT (figure 2C-D). Further, the gonadal white adipose tissue size, though smaller overall in *lqgap1*<sup>-/-</sup> mice, increased by a similar proportion in WT and *lqgap1*<sup>-/-</sup> mice (figure S2A) and showed similar expression of KD-responsive genes (figure S2B) confirming that the metabolic defect is specific to the liver.

To understand why more fat accumulated in *lqgap1*<sup>-/-</sup> livers, we examined the hepatic expression of genes controlling fatty acid breakdown and ketogenesis. We found that *Fgf21* (figure 2E), Carnitine palmitoyltransferase 1A (*Cpt1a*),  $\beta$ -oxidation genes Enoyl-CoA hydratase/3-hydroxyacyl-CoA dehydrogenase (*Ehhadh*), *Acadm*, *Hadha*, and ketogenic genes hydroxymethylglutaryl-CoA synthase 2 (*Hmgcs2*) and 3-hydroxybutyrate dehydrogenase (*Bdh1*), were all significantly down regulated (figure 2F), resulting in lower circulating levels of ketone bodies (Figure 2G) in *lqgap1*<sup>-/-</sup> animals. These results clearly indicate that IQGAP1 is required for long-term adaptation to nutritional ketosis.

Deletion of murine IQGAP1 results in increased mTOR activation and blunted ketogenic response

### **Loss of IQGAP1 deregulates PPAR $\alpha$ activation subsequent to mTORC1 activation.**

We next examined whether deletion of IQGAP1 affects the activation of the nuclear receptor PPAR $\alpha$ , a critical transcriptional regulator of the fasting and ketogenic response (14, 16). We tested PPAR $\alpha$  downstream signaling in WT and *Iqgap1*<sup>-/-</sup> mice after pharmacological activation with its agonist Wy-14,643 (WY) (32). As expected, WY-treatment induced hepatomegaly in mice. Interestingly, *Iqgap1*<sup>-/-</sup> livers were larger than WT livers (figure S3A). We found that PPAR $\alpha$  targets including *Cyp4a10*, *Cpt1a*, *Acadm*, *Ehhadh*, *Hmgcs2*, and *Bdh1* showed significantly reduced induction in *Iqgap1*<sup>-/-</sup> mice while *Hadha* showed a similar but insignificant trend (figure 3A). However, *Fgf21* showed comparable fold induction (figure 3A). Serum ketone bodies also reflected a lower range in *Iqgap1*<sup>-/-</sup> mice (figure S3B). We confirmed the cell autonomous function of IQGAP1 using primary hepatocytes from WT and *Iqgap1*<sup>-/-</sup> mice. When we challenged the primary hepatocytes with WY, only the WT cells were able to increase *Fgf21* transcript levels (figure S3D). These results reveal specific defects in fatty acid  $\beta$ -oxidation and ketone synthesis in *Iqgap1*<sup>-/-</sup> hepatocytes, indicating the requirement of IQGAP1 for these metabolic processes.

It has been previously shown that the major nutrient sensor mTORC1 can suppress transcription of ketogenic PPAR $\alpha$  targets (21). Therefore, we assessed mTORC1 activity in the liver by measuring phosphorylation of two bona fide markers S6 ribosomal protein and 4E-BP1. S6 phosphorylation at S240,244 and S235,236 sites along with phosphorylation of 4E-BP1 was increased in *Iqgap1*<sup>-/-</sup> livers compared to WT upon WY-treatment (figure 3B). We then examined if the observed elevated mTORC1 activity was unique to WY treatment or was intrinsic in the *Iqgap1*<sup>-/-</sup> livers. To address this, we analyzed fasted and re-fed WT and *Iqgap1*<sup>-/-</sup> mouse livers and found that compared to WT, *Iqgap1*<sup>-/-</sup> mice exhibit a robust 2-fold increase in hepatic mTORC1 activity upon re-feeding (figure 3C). To further confirm increased mTORC1 activation, we analyzed *Srebp1c* and *Fasn* expression levels, which are suppressed in liver-specific TSC1

Deletion of murine IQGAP1 results in increased mTOR activation and blunted ketogenic response

knockouts that have chronic mTORC1 activation (33). We found robust down regulation of these two genes in *Iqgap1*<sup>-/-</sup> livers (figure 3D). Additionally, we found that phosphorylation of S6 was higher in cultured primary hepatocytes that lacked IQGAP1 (figure S3D), further confirming a cell autonomous role for IQGAP1. To determine if IQGAP1 could regulate mTORC1 through direct interaction, we expressed FLAG-tagged IQGAP1 in HepG2 cells and pulled down IQGAP1-interacting proteins using an anti-FLAG antibody. We found increased pull down of mTOR in cells expressing FLAG-IQGAP1 (figure S3D) implying interaction of IQGAP1 with mTOR. Based on these data we infer that IQGAP1 levels are important in maintaining hepatic mTORC1 activity.

### **Hepatic fatty acid oxidation defect in *Iqgap1*<sup>-/-</sup> mice can be alleviated by either re-expressing IQGAP1 or inhibiting mTORC1**

We re-expressed IQGAP1 specifically in the livers of *Iqgap1*<sup>-/-</sup> mice using an adenoviral system to determine whether this is sufficient for inducing a normal metabolic response. IQGAP1 over-expression resulted in reduction of mTORC1 activity (figure 4A) as well as induction of the fatty acid oxidation genes (figure 4B). Similarly, overexpressing IQGAP1 in the HepG2 cell line reduced S6 phosphorylation (figure S4A). These data reveal that IQGAP1 levels are necessary to maintain mTORC1 signaling. Finally, we tested if inhibiting mTORC1 activation with rapamycin can reverse any of the ketogenic defects observed in *Iqgap1*<sup>-/-</sup> mice. We first ensured that loss of IQGAP1 did not affect mTORC1 inhibition by rapamycin both *in vivo* (figure S4B) and *in vitro* (figure S4C). We found that *Iqgap1*<sup>-/-</sup> mice treated with rapamycin were able to increase a subset of PPAR $\alpha$  target genes including *Hmgcs2*, *Fasn*, and *Acadm* to even higher levels than that of the WT (figure 4C). However, *Ppara* and *Cpt1a* levels remained blunted in *Iqgap1*<sup>-/-</sup> mice and was recapitulated in primary *Iqgap1*<sup>-/-</sup> hepatocytes (figure 4D, figure S4C). Overall, these results suggest that hepatic IQGAP1 regulates ketogenesis in an mTORC1-dependent and -independent manner (figure 4E).



Deletion of murine IQGAP1 results in increased mTOR activation and blunted ketogenic response

## Discussion

IQ motif-containing GTPase Activating Protein 1 (IQGAP1) is a cytoskeleton-associated scaffolding protein that functions in numerous multi-protein complexes and can interact with over 90 proteins. These include the MAP kinase pathway (34), PI3 kinase and AKT (3, 11), calmodulin (35), and FoxO1 (36). To investigate the role for IQGAP1 in coordinating metabolic signaling, we analyzed WT and *lqgap1*<sup>-/-</sup> mice under different nutritional conditions. We found that IQGAP1 expression was increased upon fasting and *lqgap1*<sup>-/-</sup> animals showed reduced fatty acid oxidation in the liver. However, increases in gluconeogenic genes were maintained. This could be attributed to intact expression of *Pgc1a* levels, a key regulator of gluconeogenesis (37), in the livers of *lqgap1*<sup>-/-</sup> mice.

Typically, prolonged fasting leads to ketone body synthesis, which serves an effective alternate fuel source. In particular, we found that IQGAP1 was required to maintain persistent ketogenesis. For instance, when we mimicked this metabolic state using a ketogenic diet (KD) for 4 weeks (38, 39), the *lqgap1*<sup>-/-</sup> mice showed a poor ability to break down fat and synthesize ketone bodies compared to WT mice. We mapped this to PPAR $\alpha$  signaling defect in *lqgap1*<sup>-/-</sup> mice. Importantly, *lqgap1*<sup>-/-</sup> mice mimic *Ppara*<sup>-/-</sup> mice, with both exhibiting elevated hepatic triglycerides, reduced expression of  $\beta$ -oxidation genes, and lower serum FGF21 and ketone body levels during prolonged ketosis (16). Similarly, 24-hour fasting resulted in reduced expression of some genes involved in fatty acid oxidation in *lqgap1*<sup>-/-</sup> mice relative to WT mice. However, this was not reflected at the serum ketone levels. This is similar to that of the *Fgf21*<sup>-/-</sup> mice, which also show lower ketone body levels when fed KD but do not show changes in ketone levels after 24 hour fast (40, 41). Thus, IQGAP1 may be crucial during long-term fasting specifically.

We confirmed that PPAR $\alpha$  downstream signal is dampened when IQGAP1 is deleted by treating mice with the PPAR $\alpha$  agonist Wy-14,643 (WY). Interestingly, we found that induction of a subset of PPAR $\alpha$  target genes responsible for fatty acid oxidation was specifically reduced in

Deletion of murine IQGAP1 results in increased mTOR activation and blunted ketogenic response

*lqgap1<sup>-/-</sup>* mice. On the contrary, the *Fgf21* response to WY was maintained in the absence of IQGAP1. With *Fgf21* being a starvation hormone, it exhibits dramatic induction after WY treatment in the fasting state (42). Our mice were fed *ad libitum*, which may have potentially contributed to our results. Additionally, it was previously shown that mTORC1 can inhibit PPAR $\alpha$  activation (21), and when we analyzed *lqgap1<sup>-/-</sup>* mice we found increased mTORC1 activity. On the other hand, recent findings (43) show that mTORC1 can positively control *Fgf21* expression. This in turn could explain why *lqgap1<sup>-/-</sup>* mice do not entirely lack *Fgf21* induction in response to WY. Apart from modulating fatty acid oxidation, WY potently induces liver growth and proliferation in a PPAR $\alpha$ -dependent manner (44). Contradictively, *lqgap1<sup>-/-</sup>* mice showed enhanced hepatomegaly compared to WT mice. This intriguing finding in *lqgap1<sup>-/-</sup>* livers could be secondary to the increased mTORC1 activity, which is a well-known cell growth signal (45). Moreover, we found that IQGAP1 can interact with mTOR in liver cell line indicating a cross talk between the cell growth and scaffolding pathways. In line with our findings, earlier studies have shown that IQGAP1 specifically interacts with mTORC1 (46) and this interaction could promote proliferation (47).

An important finding is that in the liver IQGAP1 levels inversely correlate with mTORC1 activity. Our results demonstrate such that transiently increasing IQGAP1 expression in *lqgap1<sup>-/-</sup>* livers can suppress mTORC1 signaling including S6 and 4E-BP1 phosphorylation. Furthermore, we were able to rescue some of the fatty acid oxidation gene expression in *lqgap1<sup>-/-</sup>* mice by inhibiting mTORC1 activity with rapamycin. This indicates that mTORC1-independent signals could also contribute towards regulating Cpt1a and PPAR $\alpha$  activity in the *lqgap1<sup>-/-</sup>* mice. Typically, mTORC1 is the major regulator of cellular energetics, but we have not ruled out the role for mTORC2 in this study.

In conclusion, our findings reveal the importance of IQGAP1 in modulating mTORC1 activity and subsequent control of nutritional response in the liver. In addition, PPAR $\alpha$  activity, specifically fatty acid oxidation and ketogenesis, is impaired when IQGAP1 is deleted. We

Deletion of murine IQGAP1 results in increased mTOR activation and blunted ketogenic response

therefore postulate that the IQGAP1 scaffold could coordinate multiple facets of long-term ketogenesis.

## Materials and Methods

### Animal experiments

Wild-type (WT) and *Iqgap1*<sup>-/-</sup> mice (Generated in Dr. A. Bernards laboratory and obtained from Dr. Valentina Schmidt, Stony Brook University) maintained on a 129/SVJ background were housed in flow cages at 24 °C on a 12/12 hour light/dark cycle. Genotype was confirmed by PCR analysis of genomic DNA as previously described (31). Male 16-20 week-old mice were used for all experiments. Mice were allowed *ad libitum* access to food and water, except during fasts when they were transferred to a clean cage with access only to water. For refeeding experiments, mice were fasted for 24 h starting at ZT 4 then refed 2 h. A subgroup of the refed mice was injected with 10 mg/kg rapamycin intraperitoneally 1 h prior to refeeding. Their standard chow diet was Teklad F6 Rodent Diet (8664, Envigo), consisting of 31%, 19%, and 50% kcal from protein, fat, and carbohydrate, respectively. In contrast, the Ketogenic Diet (TD.96355, Envigo) consisted of 9.1%, 90.5%, and 0.4% kcal from protein, fat, and carbohydrates, respectively. For fibrate treatment, Wy-14,643 (WY, Cayman Chemical) was dissolved in 100% ethanol to a final concentration of 16.5 mg/mL. The WY solution or vehicle was further diluted with corn oil (CO) to a final concentration of 5 mg/mL and stirred under vacuum overnight to remove excess ethanol. Mice were administered 0.01 mL of CO with or without WY per gram of body weight (50 mg/kg) by oral gavage for four consecutive days and sacrificed on the fifth day. For hepatic expression of GFP and IQGAP1, female *Iqgap1*<sup>-/-</sup> mice were administered high-titer adenovirus expressing either cDNA via tail vein injection. Three days after injection, mice were started on a 0.5 g/kg doxycycline (dox) diet and sacrificed after 2 weeks. All mice were sacrificed at ZT 4-6. Zeitgeber (ZT) time refers to a 24-hour light/dark cycle, with ZT0 corresponding to the appearance of light. Blood was collected from each mouse

Deletion of murine IQGAP1 results in increased mTOR activation and blunted ketogenic response

by retro-orbital bleeding just prior to sacrifice. Serum was separated by centrifugation and stored at -80 °C in opaque tubes. Liver and gonadal white adipose tissues were collected and flash frozen for analysis. A portion of each tissue was also fixed in 10% formalin for histological analysis. All animal studies were approved by the University of Illinois at Urbana-Champaign Institutional Animal Care and Use Committee and were carried out as outlined in the Guide for the Care and Use of Laboratory Animals prepared by the National Academy of Sciences and published by the National Institutes of Health.

### **Primary hepatocyte culture**

Mouse hepatocytes were isolated using a two-step collagenase perfusion technique (48). Briefly, male adult 129/SVJ WT and *Iqgap1*<sup>-/-</sup> mice were perfused with 50 mL of Solution 1 (1 μM EDTA in 1x Hanks Balanced Salt Solution without Ca<sup>2+</sup> or Mg<sup>2+</sup>). Livers were then perfused with 50 mL of Solution 2 (3000 U of collagenase type I from Worthington, 0.54 μM CaCl<sub>2</sub>, 40 μg/mL Trypsin Inhibitor, and 15 mM HEPES pH 7.4 in 1x Hanks Balanced Salt Solution with Ca<sup>2+</sup> and Mg<sup>2+</sup>). The perfused liver was then transferred to a Petri dish containing wash buffer (Williams E media with 1x Penicillin/Streptomycin and 1x L-Glutamine) and gently massaged to obtain loose cells. The cell suspension was filtered through a 70 μm filter and centrifuged at 600 x g for 4 min. The pellet was suspended in 25 mL of wash buffer and layered onto a Percoll gradient and immediately centrifuged at 600 x g for 10 min. The pellet, enriched for live hepatocytes, was washed 3 times then cells were suspended in growing medium (wash media supplemented with 1x Insulin-Transferrin-Selenium (ITS) solution from Gibco) and plated at 5 x 10<sup>5</sup> live cells/mL in 6-well collagen-coated plates. Media was changed 4-6 hours after plating to remove dead cells. Cells were either cultured for another 24 hours in growing medium or cultured in media without ITS overnight and treated with 20 nM rapamycin in the presence of 100 nM insulin for 6 hours.

Deletion of murine IQGAP1 results in increased mTOR activation and blunted ketogenic response

### **Adenovirus production and cell culture**

HepG2 cell line was obtained from ATCC (Catalogue no. HB-8065) and cultured according to ATCC specifications. This cell line tested negative for mycoplasma (Biotool, catalogue no. B39032). For *in vivo* infection, adenoviruses expressing full length *Iqgap1* and *Gfp* were generated as previously described (49). For IQGAP1 overexpression in cell culture, HepG2 cells were cultured in tetracycline (tet)-free DMEM and transfected with tet-inducible FLAG-tagged *Iqgap1* and rtTA plasmids using Mirus TransIT-X2 kit. The next day, the media was replaced with fresh DMEM containing 2 ng/mL dox, and protein was collected 24 hours later.

### **Serum chemistry**

Serum was thawed on ice prior to each metabolite assay. Assays were run in duplicate for triglycerides (Infinity Triglyceride Stable Reagent, Fisher Scientific),  $\beta$ -hydroxybutyrate ( $\beta$ -hydroxybutyrate (Ketone Body) Colorimetric Assay Kit, Cayman Chemical), and free fatty acids (Free Fatty Acid Fluorometric Assay Kit, Cayman Chemical). All assays were performed according to the kit instructions, unless stated otherwise. For the Free Fatty Acid Kit, absorbance was read at 570 nm and was adjusted for background reading at 600 nm. Additionally, Mouse/Rat FGF-21 Quantikine ELISA kit (R&D Systems) was used to measure serum FGF21 levels. Serum glucose was measured using one-touch glucose strips on fresh tail blood.

### **Glucose tolerance test**

Glucose tolerance test (GTT) was performed as previously described (50). Briefly, mice were fasted for 13 hours overnight and administered 2g/kg D-glucose intraperitoneally. Blood glucose concentrations were measured at 0, 15, 30, 60, and 120 min after injection using tail blood.

Deletion of murine IQGAP1 results in increased mTOR activation and blunted ketogenic response

### **Hepatic triglyceride assay**

Frozen liver tissue (<50 mg) was weighed and homogenized in 1 mL of isopropanol. Samples were centrifuged at 4°C and 10,000 rpm for 15 minutes, and supernatant-containing triglycerides was separated. Triglyceride content was measured using Infinity Triglyceride Liquid Stable Reagent (Fisher Scientific).

### **Histology**

Formalin fixed liver samples were embedded in paraffin wax. Five micron sections were cut and used for hematoxylin and eosin (H&E) staining according to standard methods (51).

### **Quantitative RT-PCR**

Total RNA from frozen whole liver tissue was extracted using TRIzol solution (Invitrogen) according to manufacturer's protocol. RNA quality was determined by A260/280 and bleach RNA gel as previously described (52). RNA (5 µg) was treated with DNase (Promega) and reverse transcribed using random hexamer primer (New England Biosciences) and Maxima Reverse Transcriptase kit (Thermo Scientific). The cDNA was diluted to 12.5 ng/µL with molecular grade water (Corning) and used for qRT-PCR assays. qRT-PCR was performed on an Eco Real-Time PCR system (Illumina) in triplicate using 50 ng of cDNA per reaction and PerfeCTa SYBR Green FastMix (Quanta). All assays were run with an initial activation step for 10 min. at 95 °C, followed by 40 cycles of 95 °C for 10 sec and 60 °C for 30 sec. Primer sequences are described in Table S1. *Gapdh*, *β-Actin*, and *36b4* were used as housekeeping genes.

### **Western blot analysis**

Protein was extracted from approximately 50 mg of frozen liver tissue. RIPA buffer (25mM Tris pH 7, 150mM NaCl, 0.5% sodium deoxycholate, protease inhibitor (Pierce Protease Inhibitor

Deletion of murine IQGAP1 results in increased mTOR activation and blunted ketogenic response

Mini Tablets, EDTA Free; ThermoFisher Scientific), phosphatase inhibitor (Phosphatase Inhibitor Cocktail 3; Sigma Aldrich), and 1% Triton X-100) was added to each liver sample, which was homogenized by adding 8-10 1mm beads and bullet blending for 3 x 1 minute with 1 minute on ice in between. Samples were sonicated until non-viscous. Protein concentration was measured by BCA assay (Pierce BCA Protein Assay Kit, Thermo Fisher Scientific). For western blot, 10-50  $\mu$ g of total protein was loaded onto 8-12% SDS-PAGE gels. After transfer, the membrane was incubated with antibodies described in Table S2.

### **Co-Immunoprecipitation**

HepG2 cells were transfected with dox-inducible FLAG-IQGAP1 and were treated with dox or vehicle for 24 hours. After induction, approximately  $10^7$  cells were lysed in lysis buffer (50 mM Tris pH7.8, 150 mM NaCl, 30mM EDTA, 0.5% Triton X100). The lysate was then split and equal amounts were immunoprecipitated with a FLAG antibody overnight, washed, and resolved on an 8% SDS-PAGE gel. After transfer, blots were probed with antibodies for mTOR.

### **Statistical Analysis**

Data are expressed as mean  $\pm$  SD. Student's unpaired two-tailed t-test was used to compare two groups. A \* indicates a statistically significant difference between the treatment group and its respective genotype control unless the groups are otherwise indicated. Significance is defined as  $p < 0.05$ , with \*  $p < 0.05$ , \*\*  $p < 0.01$ , \*\*\*  $p < 0.001$ , and \*\*\*\*  $p < 0.0001$ . Outliers were determined by Grubbs' test and removed from analysis.

### **Acknowledgements:**

Authors would like to thank Drs. Andre Bernards at MGH, Boston and Valentina Schmidt at Stony Brook University, New York for sharing the *Iqgap1*<sup>-/-</sup> mice. We also like to thank Dr. Jie Chen and Dr. Shomit Sengupta for their critical comments and suggestions during this study.

Deletion of murine IQGAP1 results in increased mTOR activation and blunted ketogenic response

We thank Ms. Karen Wendt who initiated the fasting experiments in *Iqgap1*<sup>-/-</sup> mice. This study was supported by start up funds from University of Illinois at Urbana-Champaign (S.A) and HD080011 NICHD (S.A).

### Author Contributions

H.L.E, and S.A. contributed to the conception, design, data acquisition, analysis and drafting of the manuscript.

### References

1. Jin J, Lee JW, Rha KS, Kim DW, Kim YM. Expression pattern of IQGAP1 in sinonasal inverted papillomas and squamous cell carcinomas. *The Laryngoscope*. 2012 Dec;122(12):2640-6. PubMed PMID: 22833392.
2. McDonald KL, O'Sullivan MG, Parkinson JF, Shaw JM, Payne CA, Brewer JM, et al. IQGAP1 and IGFBP2: valuable biomarkers for determining prognosis in glioma patients. *Journal of neuropathology and experimental neurology*. 2007 May;66(5):405-17. PubMed PMID: 17483698.
3. Chen F, Zhu HH, Zhou LF, Wu SS, Wang J, Chen Z. IQGAP1 is overexpressed in hepatocellular carcinoma and promotes cell proliferation by Akt activation. *Experimental & molecular medicine*. 2010 Jul 31;42(7):477-83. PubMed PMID: 20530982. Pubmed Central PMCID: 2912475.
4. Dong P, Nabeshima K, Nishimura N, Kawakami T, Hachisuga T, Kawarabayashi T, et al. Overexpression and diffuse expression pattern of IQGAP1 at invasion fronts are independent prognostic parameters in ovarian carcinomas. *Cancer letters*. 2006 Nov 08;243(1):120-7. PubMed PMID: 16387427.
5. Hayashi H, Nabeshima K, Aoki M, Hamasaki M, Enatsu S, Yamauchi Y, et al. Overexpression of IQGAP1 in advanced colorectal cancer correlates with poor



Deletion of murine IQGAP1 results in increased mTOR activation and blunted ketogenic response

- prognosis-critical role in tumor invasion. *International journal of cancer*. 2010 Jun 01;126(11):2563-74. PubMed PMID: 19856315.
6. Kuroda S, Fukata M, Nakagawa M, Fujii K, Nakamura T, Ookubo T, et al. Role of IQGAP1, a target of the small GTPases Cdc42 and Rac1, in regulation of E-cadherin-mediated cell-cell adhesion. *Science*. 1998 Aug 07;281(5378):832-5. PubMed PMID: 9694656.
  7. Mataraza JM, Briggs MW, Li Z, Entwistle A, Ridley AJ, Sacks DB. IQGAP1 promotes cell motility and invasion. *The Journal of biological chemistry*. 2003 Oct 17;278(42):41237-45. PubMed PMID: 12900413.
  8. Roy M, Li Z, Sacks DB. IQGAP1 binds ERK2 and modulates its activity. *The Journal of biological chemistry*. 2004 Apr 23;279(17):17329-37. PubMed PMID: 14970219.
  9. McNulty DE, Li Z, White CD, Sacks DB, Annan RS. MAPK scaffold IQGAP1 binds the EGF receptor and modulates its activation. *The Journal of biological chemistry*. 2011 Apr 29;286(17):15010-21. PubMed PMID: 21349850. Pubmed Central PMCID: 3083173.
  10. Chawla B, Hedman AC, Sayedyahosseini S, Erdemir HH, Li Z, Sacks DB. Absence of IQGAP1 Protein Leads to Insulin Resistance. *The Journal of biological chemistry*. 2017 Feb 24;292(8):3273-89. PubMed PMID: 28082684. Pubmed Central PMCID: 5336162.
  11. Choi S, Hedman AC, Sayedyahosseini S, Thapa N, Sacks DB, Anderson RA. Agonist-stimulated phosphatidylinositol-3,4,5-trisphosphate generation by scaffolded phosphoinositide kinases. *Nature cell biology*. 2016 Dec;18(12):1324-35. PubMed PMID: 27870828.
  12. Postic C, Girard J. Contribution of de novo fatty acid synthesis to hepatic steatosis and insulin resistance: lessons from genetically engineered mice. *The Journal of clinical investigation*. 2008 Mar;118(3):829-38. PubMed PMID: 18317565. Pubmed Central PMCID: 2254980.

Deletion of murine IQGAP1 results in increased mTOR activation and blunted ketogenic response

13. Meertens LM, Miyata KS, Cechetto JD, Rachubinski RA, Capone JP. A mitochondrial ketogenic enzyme regulates its gene expression by association with the nuclear hormone receptor PPARAlpha. *The EMBO journal*. 1998 Dec 01;17(23):6972-8. PubMed PMID: 9843503. Pubmed Central PMCID: 1171045.
14. Kersten S, Seydoux J, Peters JM, Gonzalez FJ, Desvergne B, Wahli W. Peroxisome proliferator-activated receptor alpha mediates the adaptive response to fasting. *The Journal of clinical investigation*. 1999 Jun;103(11):1489-98. PubMed PMID: 10359558. Pubmed Central PMCID: 408372.
15. Inagaki T, Dutchak P, Zhao G, Ding X, Gautron L, Parameswara V, et al. Endocrine regulation of the fasting response by PPARAlpha-mediated induction of fibroblast growth factor 21. *Cell metabolism*. 2007 Jun;5(6):415-25. PubMed PMID: 17550777.
16. Badman MK, Pissios P, Kennedy AR, Koukos G, Flier JS, Maratos-Flier E. Hepatic fibroblast growth factor 21 is regulated by PPARAlpha and is a key mediator of hepatic lipid metabolism in ketotic states. *Cell metabolism*. 2007 Jun;5(6):426-37. PubMed PMID: 17550778.
17. Kersten S. Integrated physiology and systems biology of PPARAlpha. *Molecular metabolism*. 2014 Jul;3(4):354-71. PubMed PMID: 24944896. Pubmed Central PMCID: 4060217.
18. Grabacka M, Pierzchalska M, Dean M, Reiss K. Regulation of Ketone Body Metabolism and the Role of PPARAlpha. *International journal of molecular sciences*. 2016 Dec 13;17(12). PubMed PMID: 27983603. Pubmed Central PMCID: 5187893.
19. Kimball SR, Jefferson LS, Nguyen HV, Suryawan A, Bush JA, Davis TA. Feeding stimulates protein synthesis in muscle and liver of neonatal pigs through an mTOR-dependent process. *American journal of physiology Endocrinology and metabolism*. 2000 Nov;279(5):E1080-7. PubMed PMID: 11052963.

Deletion of murine IQGAP1 results in increased mTOR activation and blunted ketogenic response

20. Laplante M, Sabatini DM. mTOR signaling in growth control and disease. *Cell*. 2012 Apr 13;149(2):274-93. PubMed PMID: 22500797. Pubmed Central PMCID: 3331679.
21. Sengupta S, Peterson TR, Laplante M, Oh S, Sabatini DM. mTORC1 controls fasting-induced ketogenesis and its modulation by ageing. *Nature*. 2010 Dec 23;468(7327):1100-4. PubMed PMID: 21179166.
22. Brunn GJ, Hudson CC, Sekulic A, Williams JM, Hosoi H, Houghton PJ, et al. Phosphorylation of the translational repressor PHAS-I by the mammalian target of rapamycin. *Science*. 1997 Jul 04;277(5322):99-101. PubMed PMID: 9204908.
23. Burnett PE, Barrow RK, Cohen NA, Snyder SH, Sabatini DM. RAFT1 phosphorylation of the translational regulators p70 S6 kinase and 4E-BP1. *Proceedings of the National Academy of Sciences of the United States of America*. 1998 Feb 17;95(4):1432-7. PubMed PMID: 9465032. Pubmed Central PMCID: 19032.
24. Porstmann T, Santos CR, Griffiths B, Cully M, Wu M, Leevers S, et al. SREBP activity is regulated by mTORC1 and contributes to Akt-dependent cell growth. *Cell metabolism*. 2008 Sep;8(3):224-36. PubMed PMID: 18762023. Pubmed Central PMCID: 2593919.
25. Duvel K, Yecies JL, Menon S, Raman P, Lipovsky AI, Souza AL, et al. Activation of a metabolic gene regulatory network downstream of mTOR complex 1. *Molecular cell*. 2010 Jul 30;39(2):171-83. PubMed PMID: 20670887. Pubmed Central PMCID: 2946786.
26. Kim J, Kundu M, Viollet B, Guan KL. AMPK and mTOR regulate autophagy through direct phosphorylation of Ulk1. *Nature cell biology*. 2011 Feb;13(2):132-41. PubMed PMID: 21258367. Pubmed Central PMCID: 3987946.
27. Martina JA, Chen Y, Gucek M, Puertollano R. MTORC1 functions as a transcriptional regulator of autophagy by preventing nuclear transport of TFEB. *Autophagy*. 2012 Jun;8(6):903-14. PubMed PMID: 22576015. Pubmed Central PMCID: 3427256.
28. Saxton RA, Sabatini DM. mTOR Signaling in Growth, Metabolism, and Disease. *Cell*. 2017 Apr 06;169(2):361-71. PubMed PMID: 28388417.

Deletion of murine IQGAP1 results in increased mTOR activation and blunted ketogenic response

29. Gwinn DM, Shackelford DB, Egan DF, Mihaylova MM, Mery A, Vasquez DS, et al. AMPK phosphorylation of raptor mediates a metabolic checkpoint. *Molecular cell*. 2008 Apr 25;30(2):214-26. PubMed PMID: 18439900. Pubmed Central PMCID: 2674027.
30. Jameson KL, Mazur PK, Zehnder AM, Zhang J, Zarnegar B, Sage J, et al. IQGAP1 scaffold-kinase interaction blockade selectively targets RAS-MAP kinase-driven tumors. *Nature medicine*. 2013 May;19(5):626-30. PubMed PMID: 23603816. Pubmed Central PMCID: 4190012.
31. Li S, Wang Q, Chakladar A, Bronson RT, Bernards A. Gastric hyperplasia in mice lacking the putative Cdc42 effector IQGAP1. *Molecular and cellular biology*. 2000 Jan;20(2):697-701. PubMed PMID: 10611248. Pubmed Central PMCID: 85173.
32. Schoonjans K, Peinado-Onsurbe J, Lefebvre AM, Heyman RA, Briggs M, Deeb S, et al. PPARalpha and PPARgamma activators direct a distinct tissue-specific transcriptional response via a PPRE in the lipoprotein lipase gene. *The EMBO journal*. 1996 Oct 01;15(19):5336-48. PubMed PMID: 8895578. Pubmed Central PMCID: 452277.
33. Yecies JL, Zhang HH, Menon S, Liu S, Yecies D, Lipovsky AI, et al. Akt stimulates hepatic SREBP1c and lipogenesis through parallel mTORC1-dependent and independent pathways. *Cell metabolism*. 2011 Jul 06;14(1):21-32. PubMed PMID: 21723501. Pubmed Central PMCID: 3652544.
34. Roy M, Li Z, Sacks DB. IQGAP1 is a scaffold for mitogen-activated protein kinase signaling. *Molecular and cellular biology*. 2005 Sep;25(18):7940-52. PubMed PMID: 16135787. Pubmed Central PMCID: 1234344.
35. Hart MJ, Callow MG, Souza B, Polakis P. IQGAP1, a calmodulin-binding protein with a rasGAP-related domain, is a potential effector for cdc42Hs. *The EMBO journal*. 1996 Jun 17;15(12):2997-3005. PubMed PMID: 8670801. Pubmed Central PMCID: 450241.
36. Pan CW, Jin X, Zhao Y, Pan Y, Yang J, Karnes RJ, et al. AKT-phosphorylated FOXO1 suppresses ERK activation and chemoresistance by disrupting IQGAP1-MAPK

Deletion of murine IQGAP1 results in increased mTOR activation and blunted ketogenic response

- interaction. *The EMBO journal*. 2017 Apr 13;36(8):995-1010. PubMed PMID: 28279977.  
Pubmed Central PMCID: 5391142.
37. Yoon JC, Puigserver P, Chen G, Donovan J, Wu Z, Rhee J, et al. Control of hepatic gluconeogenesis through the transcriptional coactivator PGC-1. *Nature*. 2001 Sep 13;413(6852):131-8. PubMed PMID: 11557972.
  38. Bielohuby M, Menhofer D, Kirchner H, Stoehr BJ, Muller TD, Stock P, et al. Induction of ketosis in rats fed low-carbohydrate, high-fat diets depends on the relative abundance of dietary fat and protein. *American journal of physiology Endocrinology and metabolism*. 2011 Jan;300(1):E65-76. PubMed PMID: 20943751.
  39. Kennedy AR, Pissios P, Otu H, Roberson R, Xue B, Asakura K, et al. A high-fat, ketogenic diet induces a unique metabolic state in mice. *American journal of physiology Endocrinology and metabolism*. 2007 Jun;292(6):E1724-39. PubMed PMID: 17299079.
  40. Badman MK, Koester A, Flier JS, Kharitonov A, Maratos-Flier E. Fibroblast growth factor 21-deficient mice demonstrate impaired adaptation to ketosis. *Endocrinology*. 2009 Nov;150(11):4931-40. PubMed PMID: 19819944. Pubmed Central PMCID: 2775979.
  41. Owen BM, Mangelsdorf DJ, Kliewer SA. Tissue-specific actions of the metabolic hormones FGF15/19 and FGF21. *Trends in endocrinology and metabolism: TEM*. 2015 Jan;26(1):22-9. PubMed PMID: 25476453. Pubmed Central PMCID: 4277911.
  42. Lundasen T, Hunt MC, Nilsson LM, Sanyal S, Angelin B, Alexson SE, et al. PPARalpha is a key regulator of hepatic FGF21. *Biochemical and biophysical research communications*. 2007 Aug 24;360(2):437-40. PubMed PMID: 17601491.
  43. Cornu M, Oppliger W, Albert V, Robitaille AM, Trapani F, Quagliata L, et al. Hepatic mTORC1 controls locomotor activity, body temperature, and lipid metabolism through FGF21. *Proceedings of the National Academy of Sciences of the United States of*

Deletion of murine IQGAP1 results in increased mTOR activation and blunted ketogenic response

- America. 2014 Aug 12;111(32):11592-9. PubMed PMID: 25082895. Pubmed Central PMCID: 4136616.
44. Lee SS, Pineau T, Drago J, Lee EJ, Owens JW, Kroetz DL, et al. Targeted disruption of the alpha isoform of the peroxisome proliferator-activated receptor gene in mice results in abolishment of the pleiotropic effects of peroxisome proliferators. *Molecular and cellular biology*. 1995 Jun;15(6):3012-22. PubMed PMID: 7539101. Pubmed Central PMCID: 230532.
  45. Ben-Sahra I, Manning BD. mTORC1 signaling and the metabolic control of cell growth. *Current opinion in cell biology*. 2017 Apr;45:72-82. PubMed PMID: 28411448. Pubmed Central PMCID: 5545101.
  46. Tekletsadik YK, Sonn R, Osman MA. A conserved role of IQGAP1 in regulating TOR complex 1. *Journal of cell science*. 2012 Apr 15;125(Pt 8):2041-52. PubMed PMID: 22328503. Pubmed Central PMCID: 3360921.
  47. Wang JB, Sonn R, Tekletsadik YK, Samorodnitsky D, Osman MA. IQGAP1 regulates cell proliferation through a novel CDC42-mTOR pathway. *Journal of cell science*. 2009 Jun 15;122(Pt 12):2024-33. PubMed PMID: 19454477. Pubmed Central PMCID: 2723156.
  48. Li WC, Ralphs KL, Tosh D. Isolation and culture of adult mouse hepatocytes. *Methods in molecular biology*. 2010;633:185-96. PubMed PMID: 20204628.
  49. Anakk S, Bhosale M, Schmidt VA, Johnson RL, Finegold MJ, Moore DD. Bile acids activate YAP to promote liver carcinogenesis. *Cell reports*. 2013 Nov 27;5(4):1060-9. PubMed PMID: 24268772. Pubmed Central PMCID: 3961013.
  50. Norris AW, Chen L, Fisher SJ, Szanto I, Ristow M, Jozsi AC, et al. Muscle-specific PPARgamma-deficient mice develop increased adiposity and insulin resistance but respond to thiazolidinediones. *The Journal of clinical investigation*. 2003 Aug;112(4):608-18. PubMed PMID: 12925701. Pubmed Central PMCID: 171387.

Deletion of murine IQGAP1 results in increased mTOR activation and blunted ketogenic response

51. Cardiff RD, Miller CH, Munn RJ. Manual hematoxylin and eosin staining of mouse tissue sections. Cold Spring Harbor protocols. 2014 Jun 02;2014(6):655-8. PubMed PMID: 24890205.
52. Aranda PS, LaJoie DM, Jorcyk CL. Bleach gel: a simple agarose gel for analyzing RNA quality. Electrophoresis. 2012 Jan;33(2):366-9. PubMed PMID: 22222980. Pubmed Central PMCID: 3699176.

Deletion of murine IQGAP1 results in increased mTOR activation and blunted ketogenic response

## Figure Legends

### Figure 1. Hepatic IQGAP1 is regulated by fasting and is required for the fasting response.

Mice were fed *ad libitum* or fasted for 24 h and sacrificed at ZT 4. (A) *Iqgap1* gene expression normalized to *Gapdh* expression in livers of WT mice as measured by quantitative reverse transcription PCR (qPCR). (B) Immunoblots of liver extracts from WT mice. Each lane consists of a mixture of liver extracts from two animals (n = 6 mice per group). Protein levels were measured by densitometry. IQGAP1 levels were normalized to GAPDH expression. Relative average expression in fasted livers compared to fed livers is indicated above the scatter graph. (C-D) Serum non-esterified fatty acid (NEFA) and triglyceride levels (n = 5-9 per group). The percentage changes in serum levels compared to respective fed control mice are indicated. (E) Representative images of hematoxylin/eosin (H&E) staining of liver sections from *Iqgap1*<sup>-/-</sup> and WT mice (n = 5-6 per group) at 400x magnification. Inset is 800x magnification. (F-G) Hepatic gene expression of *Cpt1a*, *Acadm*, *Hadha*, and *Fgf21* normalized to *Gapdh* in WT and *Iqgap1*<sup>-/-</sup> mice. (H) Serum FGF21 levels were measured by ELISA (n = 6-7 mice per group).

**Figure 2. Loss of IQGAP1 results in a blunted ketogenic response.** WT and *Iqgap1*<sup>-/-</sup> mice were fed a ketogenic diet (KD) for 4 weeks and fasted overnight (n = 6 per group). As a control, mice were fed normal chow *ad libitum*. (A) Liver weight normalized to total body weight. (B) Gross appearance of livers from KD-fed WT and *Iqgap1*<sup>-/-</sup> mice (*upper*). Representative images of H&E stained liver sections from KD-fed mice (*lower*) at 400x magnification (n = 6 mice per group). Inset is 800x magnification. Hepatic triglyceride was measured in *Iqgap1*<sup>-/-</sup> and WT mice (*right*). (C-D) Serum NEFA and triglyceride levels. (E) Hepatic *Fgf21* expression normalized to *Gapdh* expression in WT and *Iqgap1*<sup>-/-</sup> mice. (F) Heat map summarizing hepatic  $\beta$ -oxidation and ketogenesis gene expression normalized to *Gapdh* expression in KD-fed WT and *Iqgap1*<sup>-/-</sup> mice relative to genotype controls. Values are expressed as mean  $\pm$  SD. (G) Serum  $\beta$ -hydroxybutyrate levels.



Deletion of murine IQGAP1 results in increased mTOR activation and blunted ketogenic response

**Figure 3. IQGAP1 regulates PPAR $\alpha$  and mTORC1 activity.** (A) Heat map summarizing the fold change in hepatic PPAR $\alpha$  target gene expression upon WY treatment in WT and *Iqgap1*<sup>-/-</sup> mice relative to CO-treated genotype controls. Expression was normalized to the average of *Gapdh* and *Actin* expression. (B) Immunoblot of liver extracts from WT and *Iqgap1*<sup>-/-</sup> mice treated with WY. Each lane consists of a mixture of liver extracts from two mice (n = 6 mice per group). The amount of phosphorylated-S6 (p-S6) at indicated mTORC1-specific (S240,244) and mTORC1-non-specific (S235,236) serine residues were normalized to total-S6 expression and phosphorylated-4E-BP1 (p-4E-BP1) levels were normalized to GAPDH expression. Relative average expression in *Iqgap1*<sup>-/-</sup> mice compared to WT mice is indicated. (C) Immunoblot of liver extracts from WT and *Iqgap1*<sup>-/-</sup> mice fasted for 24 h or fasted 24 h and refed (RF) 2 h (*upper*). Each lane consists of a mixture of liver extracts from two mice. P-S6 (S235,236) and p-S6 (S240,244) levels were normalized to total-S6 expression and p-4E-BP1 levels were normalized to GAPDH expression (*bottom*). (D) Hepatic gene expression of *Srebp1c* and *Fasn* normalized to *Gapdh* expression in WT and *Iqgap1*<sup>-/-</sup> mice fasted for 24 h and refed 2 h.

**Figure 4. IQGAP1 regulation of a subset of PPAR $\alpha$  gene targets is mTORC1-dependent.**

(A) *Iqgap1*<sup>-/-</sup> mice were infected with adenoviruses expressing either GFP or IQGAP1 and sacrificed after 2 weeks. Immunoblot of liver extracts infected with AD.GFP and AD.IQGAP1. Each lane represents an individual mouse (n = 3 mice per group). P-S6 (S235,236) and p-S6 (S240,244) levels were normalized to total-S6 expression and p-4E-BP1 levels were normalized to GAPDH expression. Relative average levels are indicated for AD.IQGAP1 relative to AD.GFP mice. (B) Hepatic gene expression of *Cpt1a*, *Acadm*, and *Hmgcs2* normalized to *Gapdh* expression in AD.GFP and AD.IQGAP1 infected *Iqgap1*<sup>-/-</sup> mice. (C) WT and *Iqgap1*<sup>-/-</sup> mice were fasted 24 h and refed 2 h (RF) with or without rapamycin (Rap) treatment 1 h before refeeding. Heat map summarizing hepatic fold change in gene expression in Rap+RF mice relative to RF genotype controls. Expression was normalized to *Gapdh* expression. (D) Gene expression of

Deletion of murine IQGAP1 results in increased mTOR activation and blunted ketogenic response

*Cpt1a* normalized to *Gapdh* expression in WT and *Iqgap1*<sup>-/-</sup> hepatocytes treated with 20 nM Rapamycin or vehicle (DMSO) for 6 hours. Each symbol represents hepatocytes from an individual mouse (n = 3-5 per group). (E) Model illustrating how IQGAP1 regulates PPAR $\alpha$  activation.



Deletion of murine IQGAP1 results in increased mTOR activation and blunted ketogenic response

Figure 2

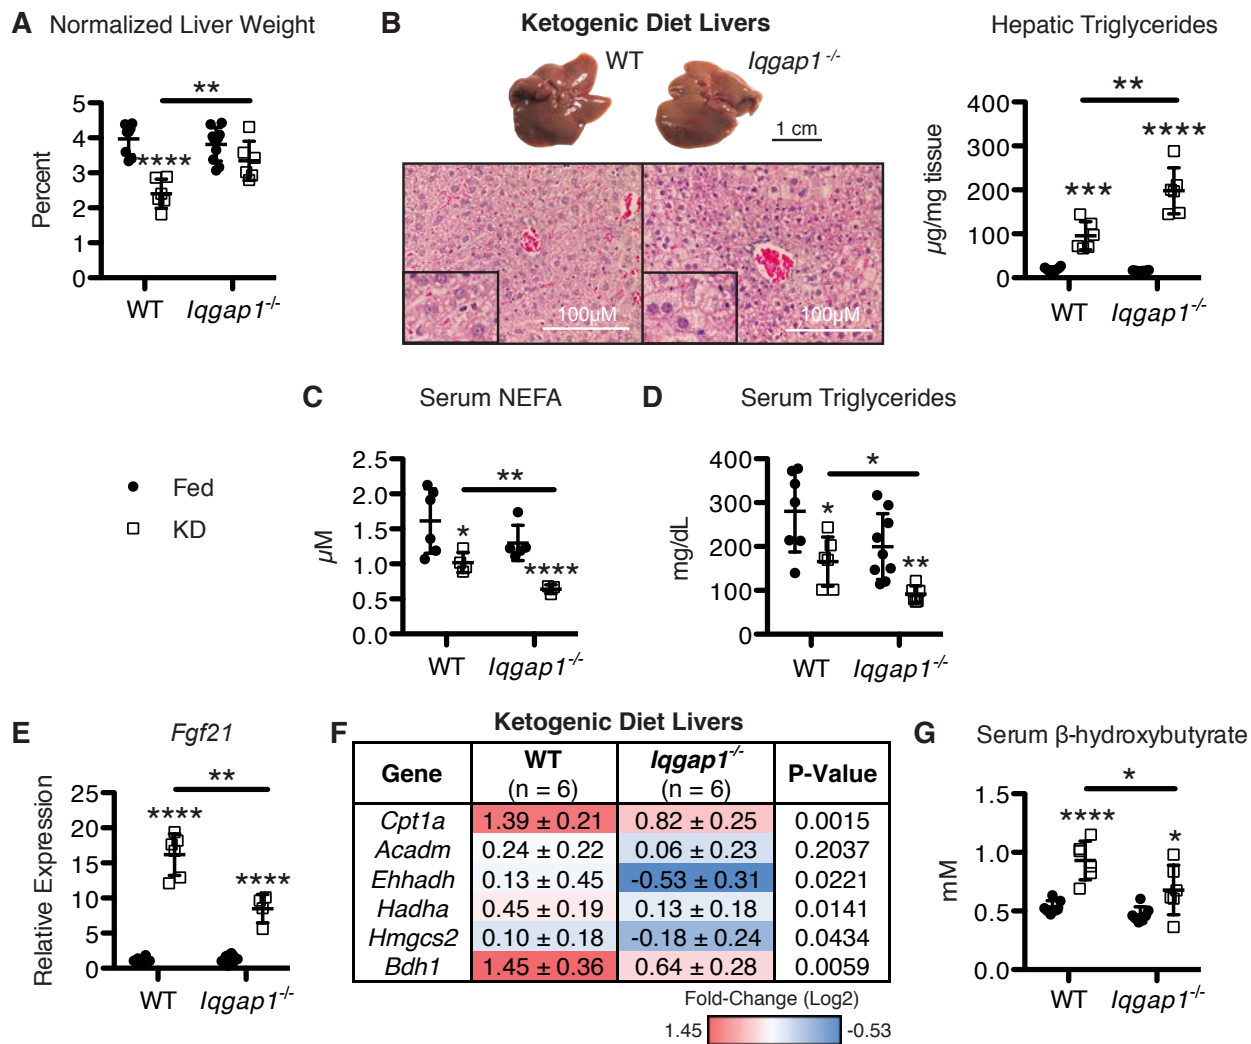

Deletion of murine IQGAP1 results in increased mTOR activation and blunted ketogenic response

**Figure 3**

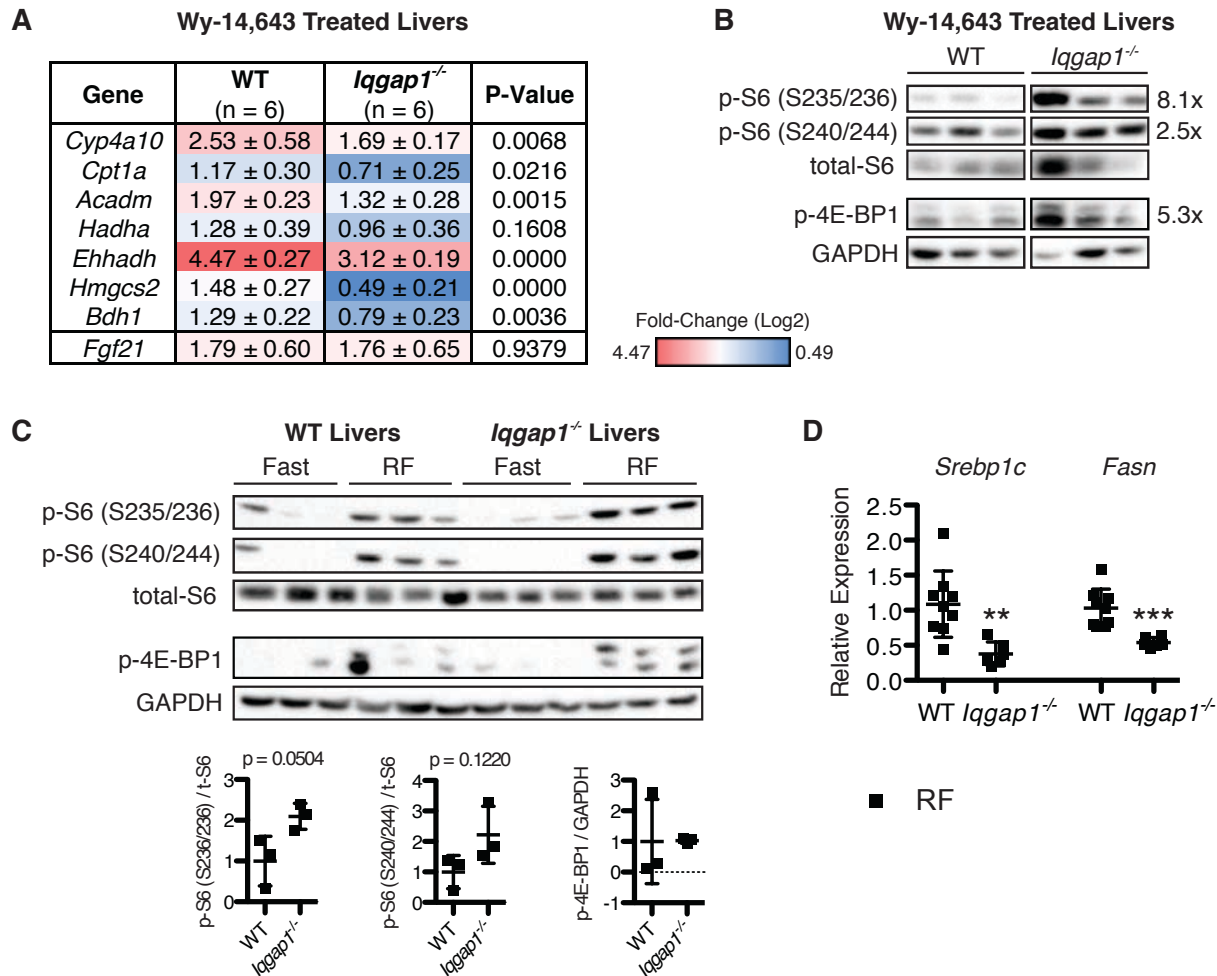

Deletion of murine IQGAP1 results in increased mTOR activation and blunted ketogenic response

Figure 4

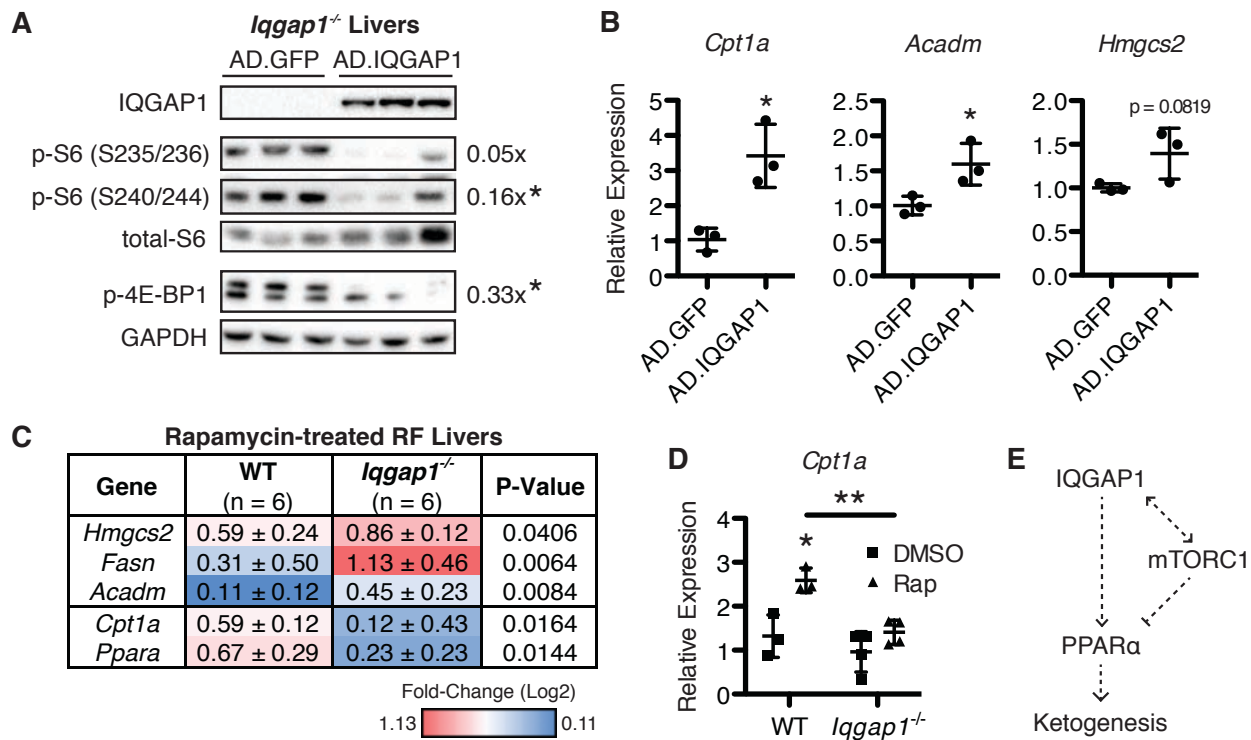

Source: https://www.biorxiv.org/content/10.1101/182469v1.full.pdf
